# Supplementary figures and images for: Towards superlubricity in nanostructured surfaces: the role of van der Waals forces
Source: Royal Society of Chemistry journal article supplement (doi:10.1039/c8cp02508h), 2018-01-01

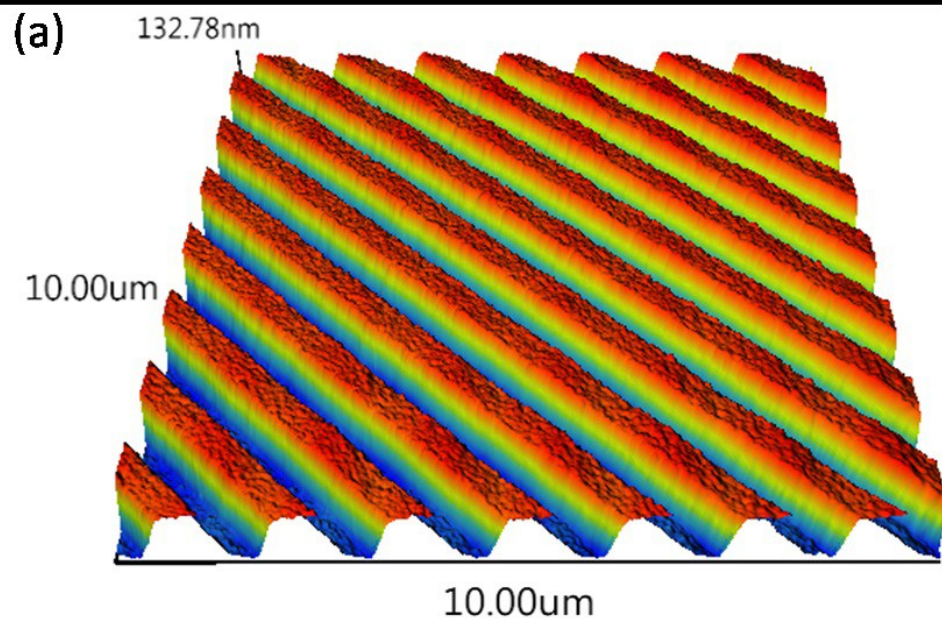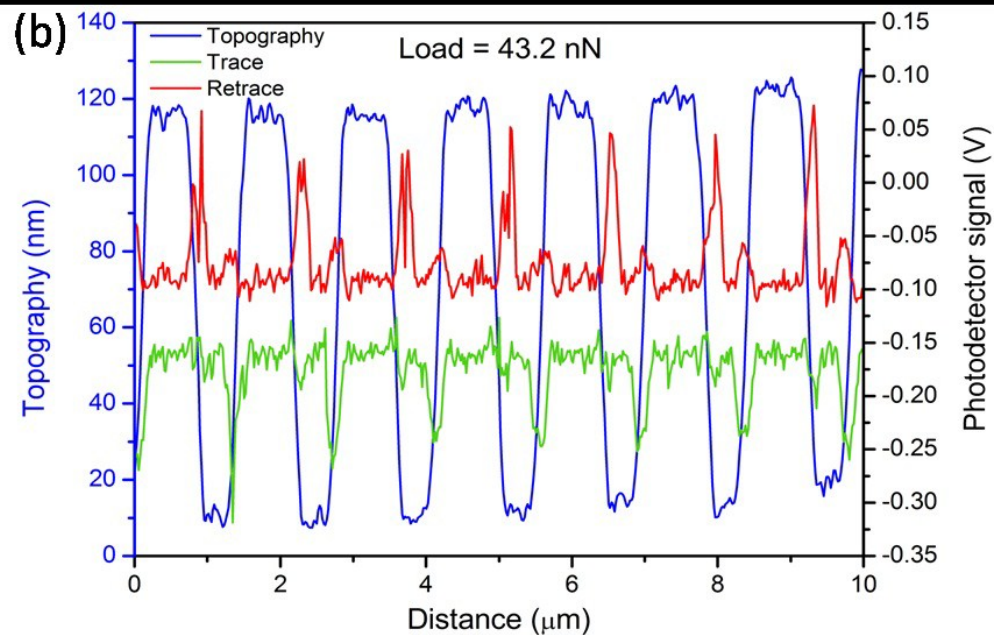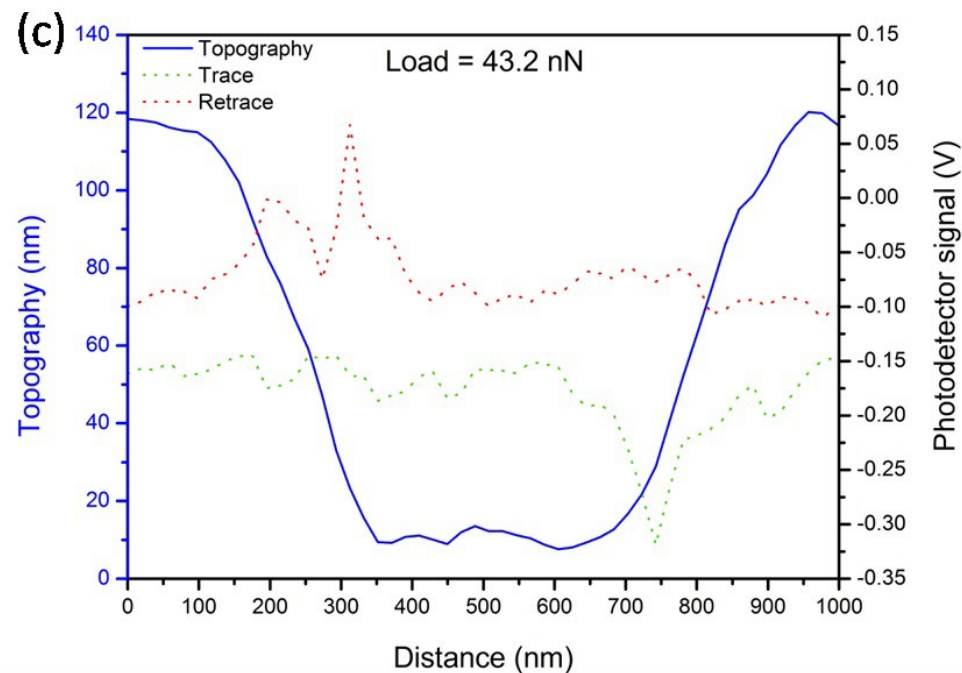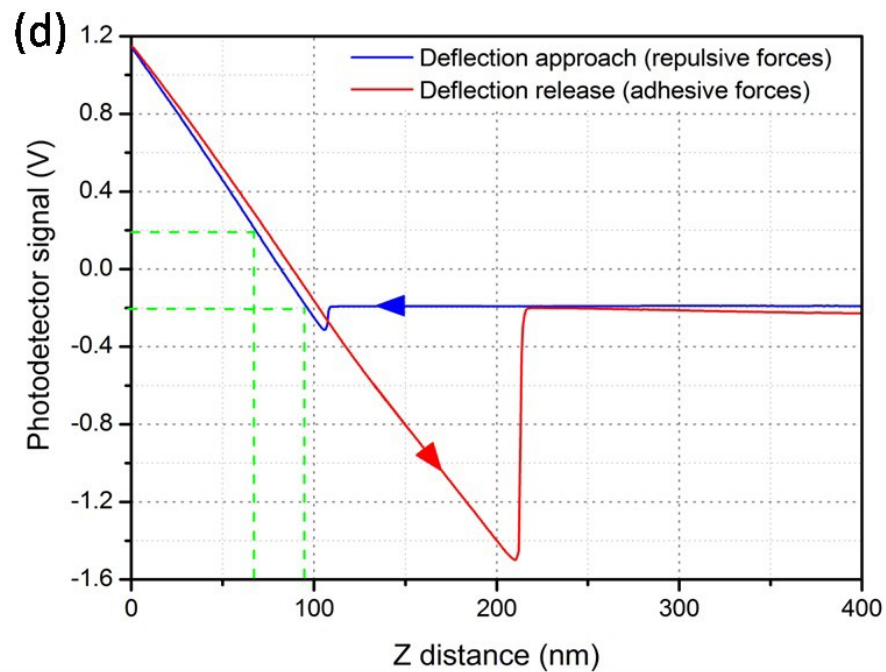

Supplement: c8cp02508h10.pdf [file c8cp02508h10.pdf]

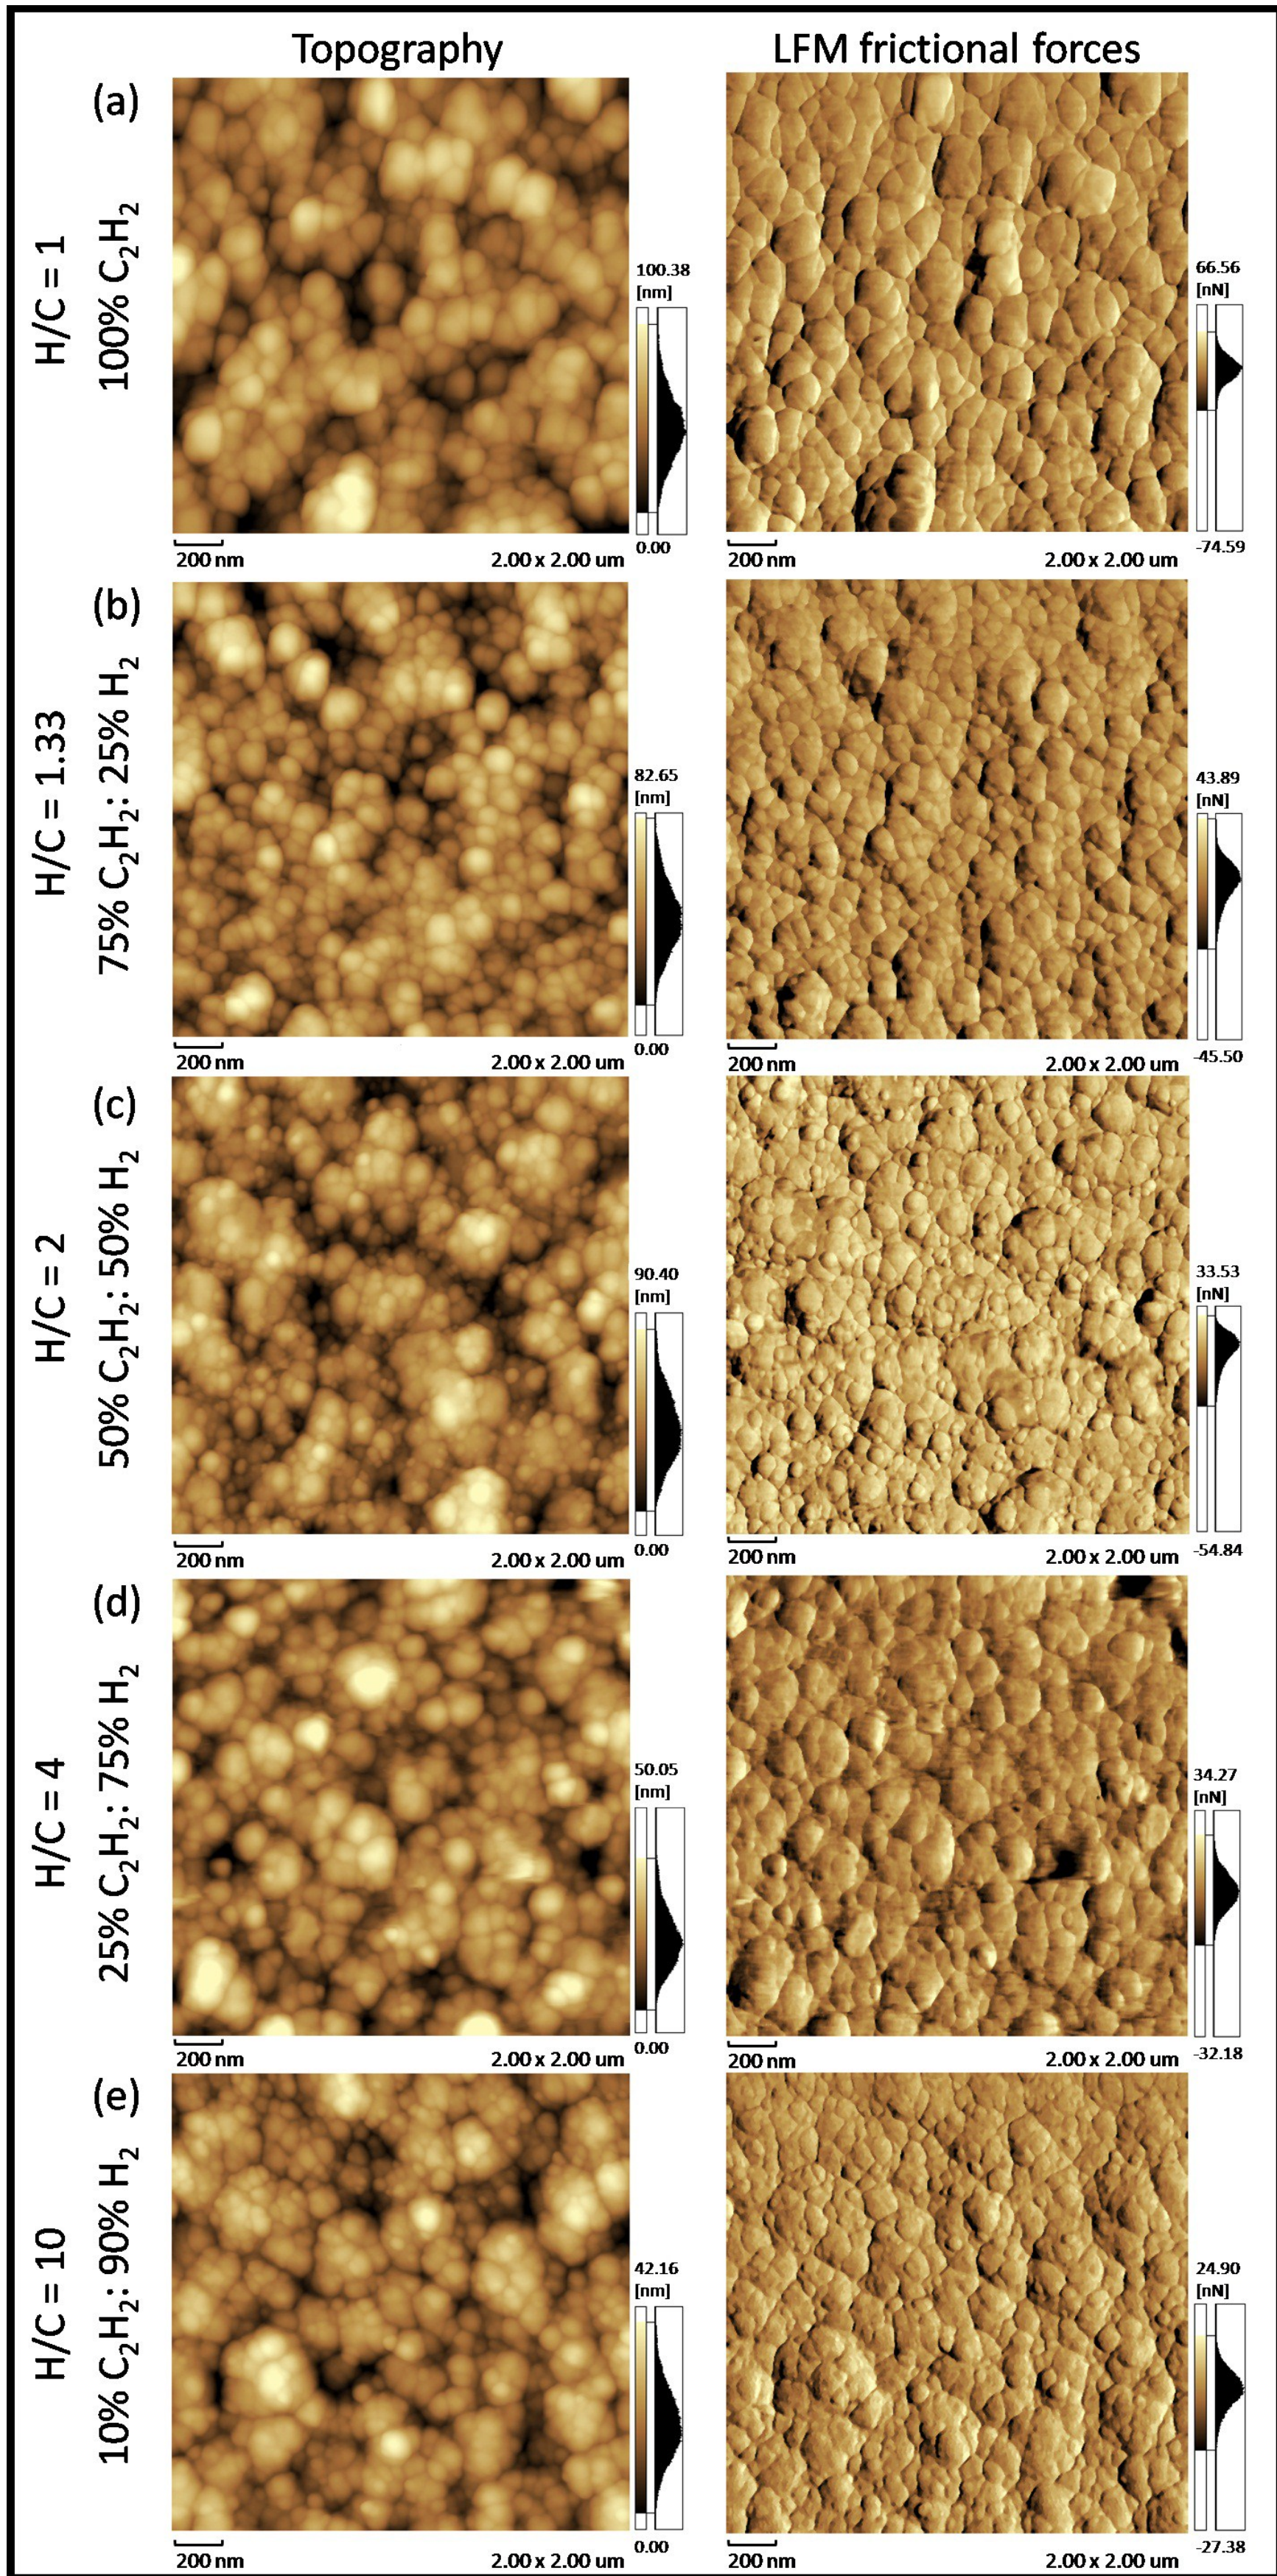

Supplement: c8cp02508h11.pdf [file c8cp02508h11.pdf]

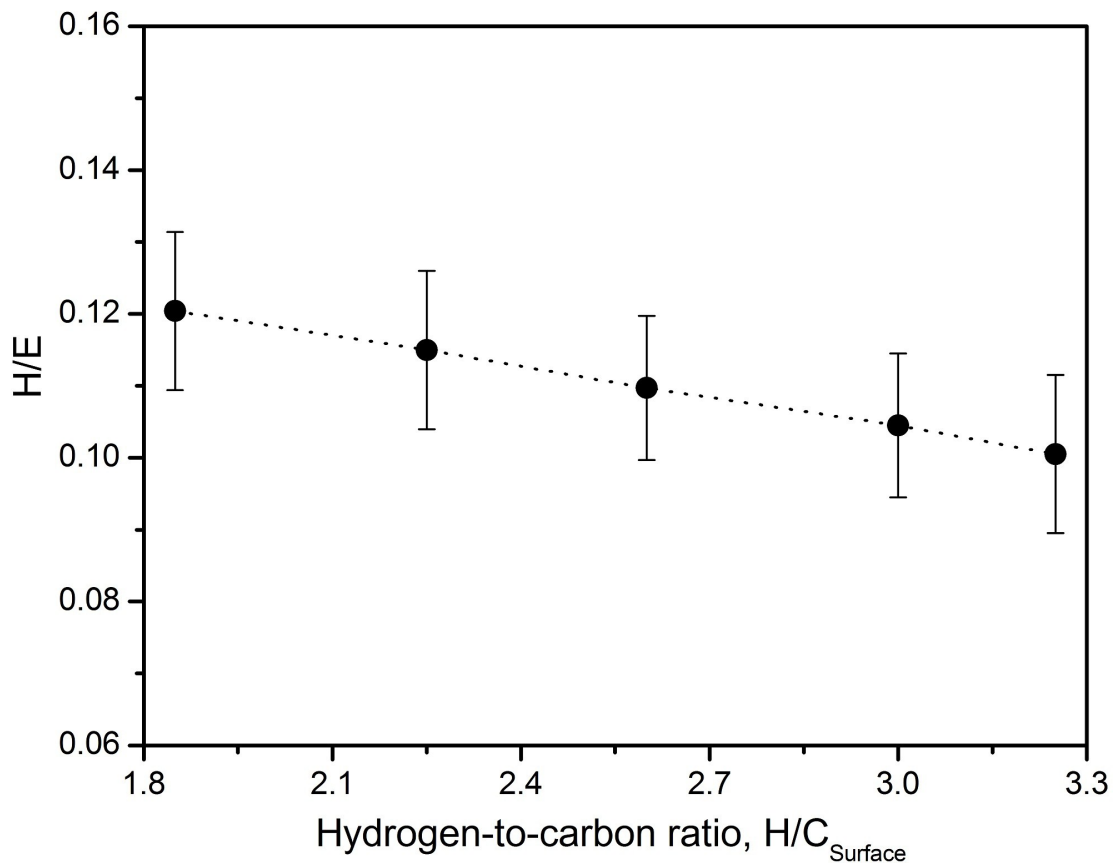

Supplement: c8cp02508h4.pdf [file c8cp02508h4.pdf]

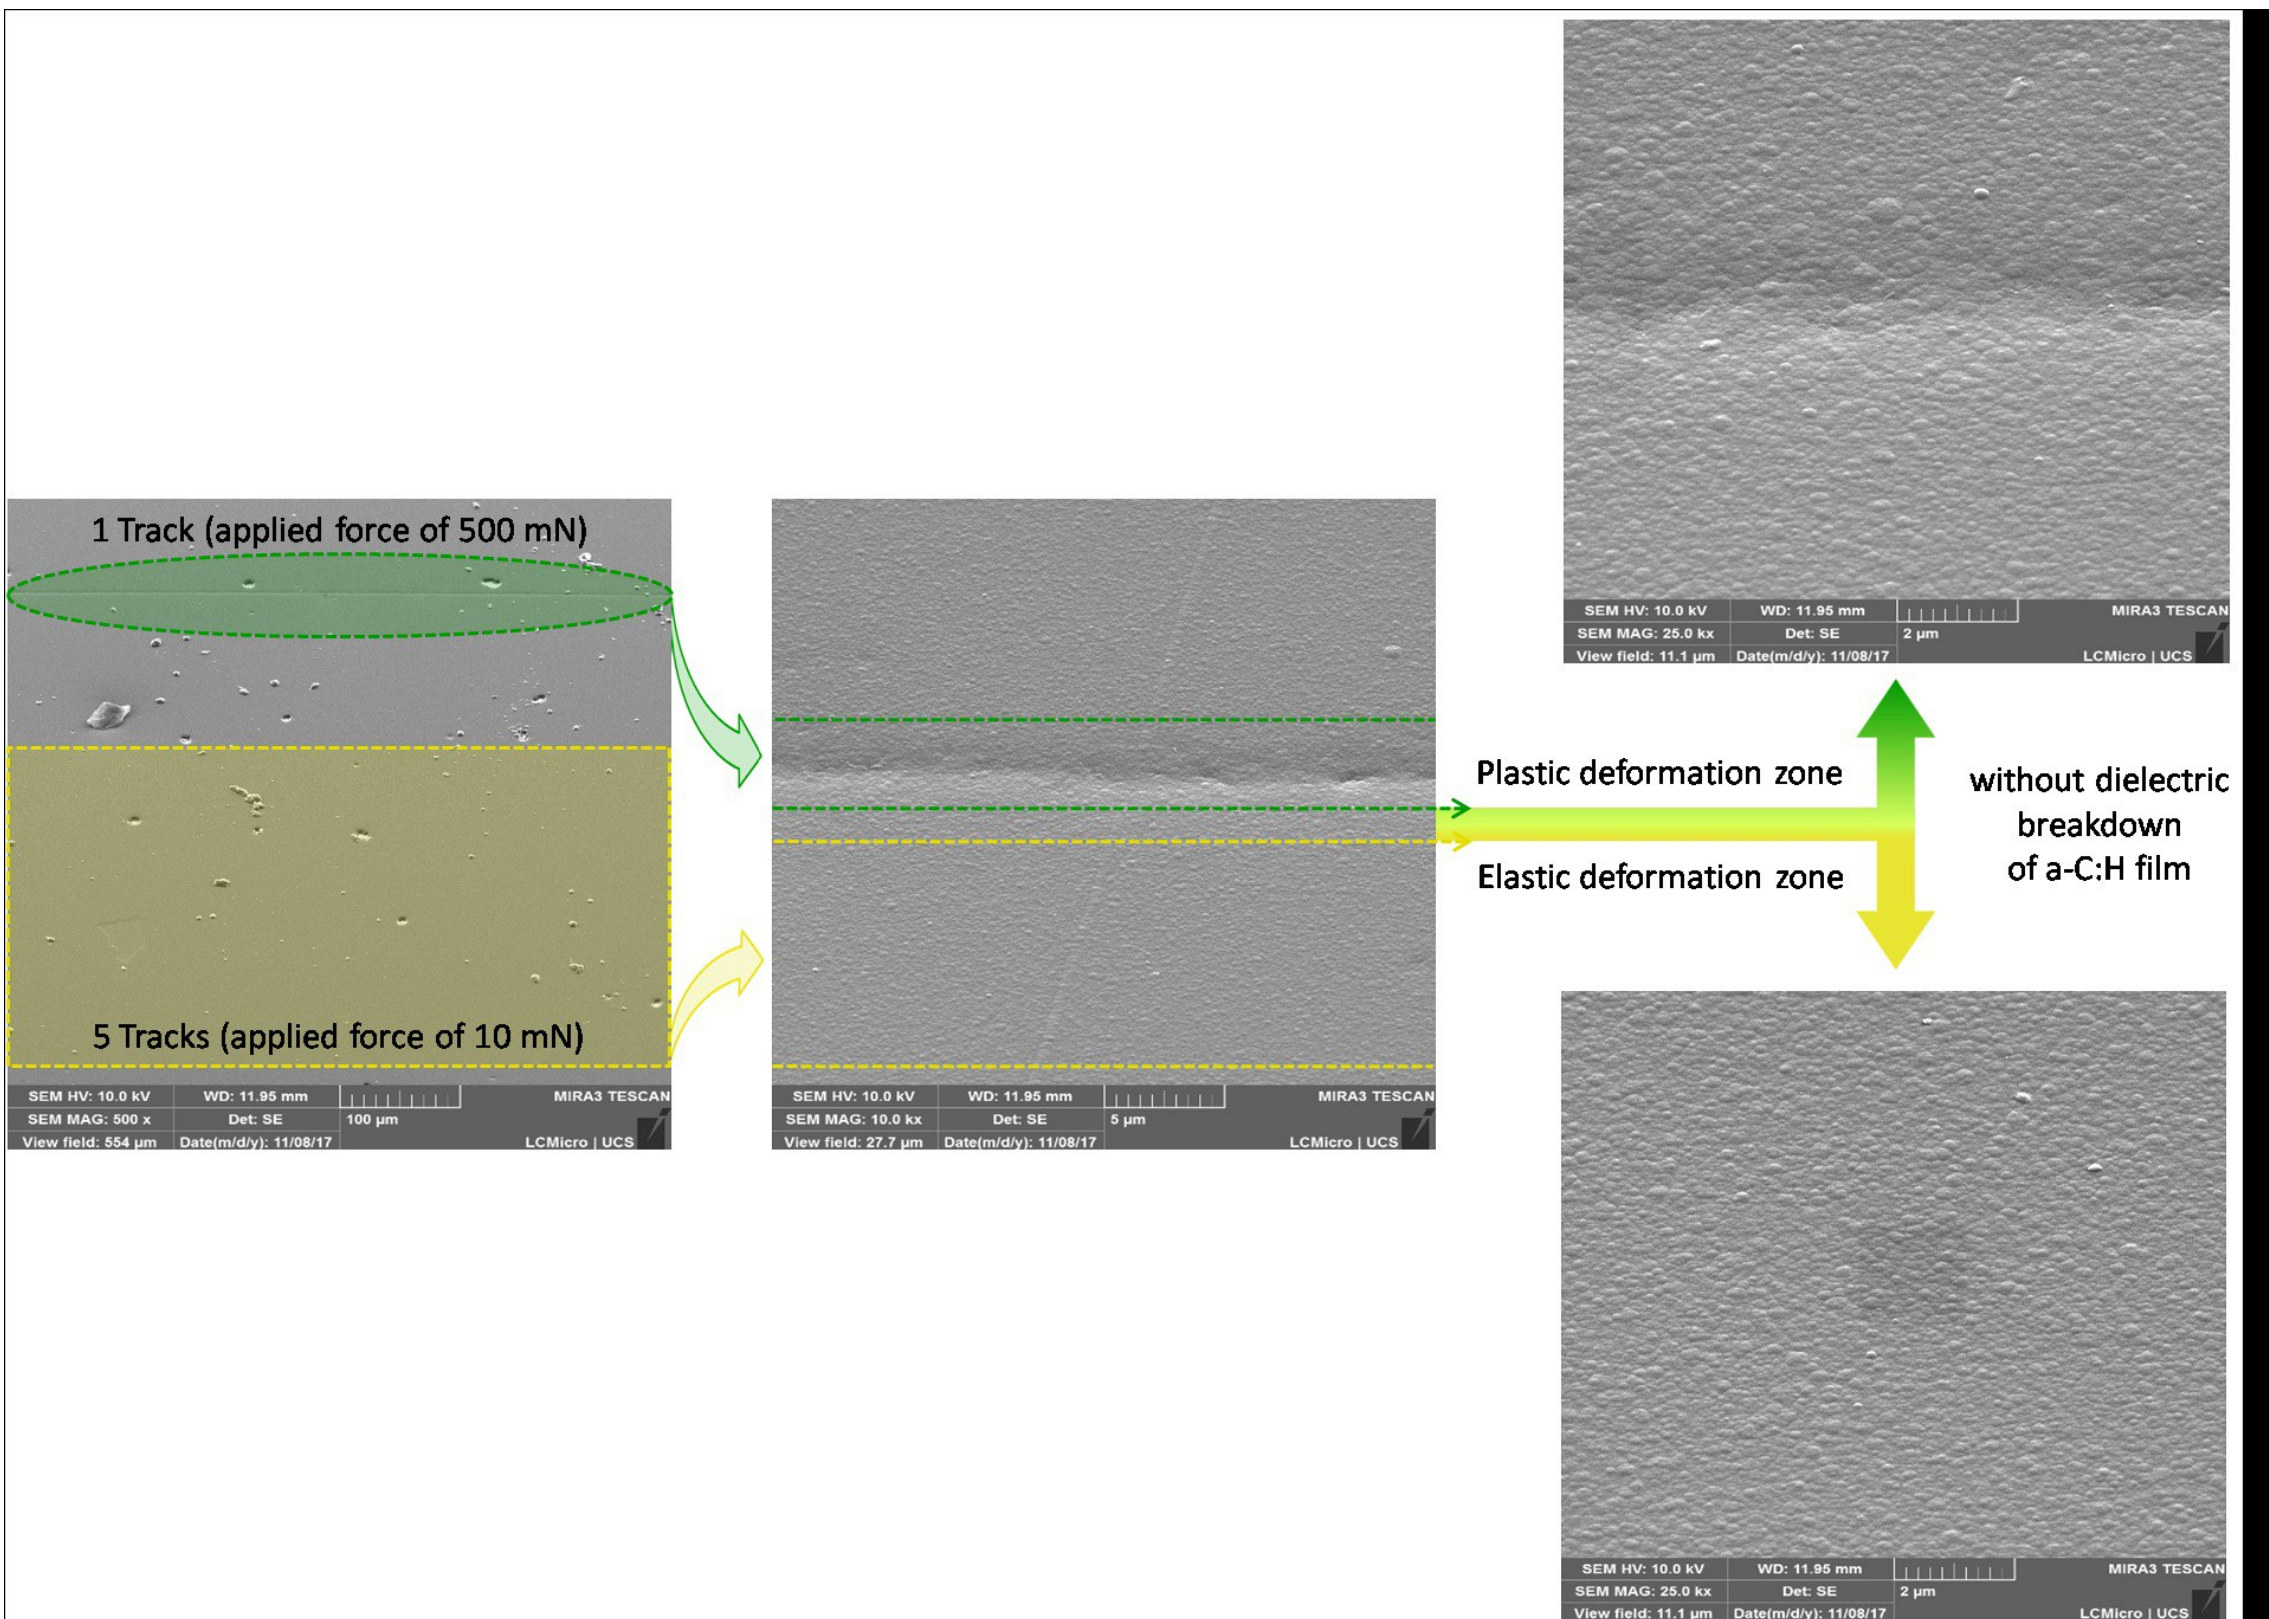

Supplement: c8cp02508h6.pdf [file c8cp02508h6.pdf]

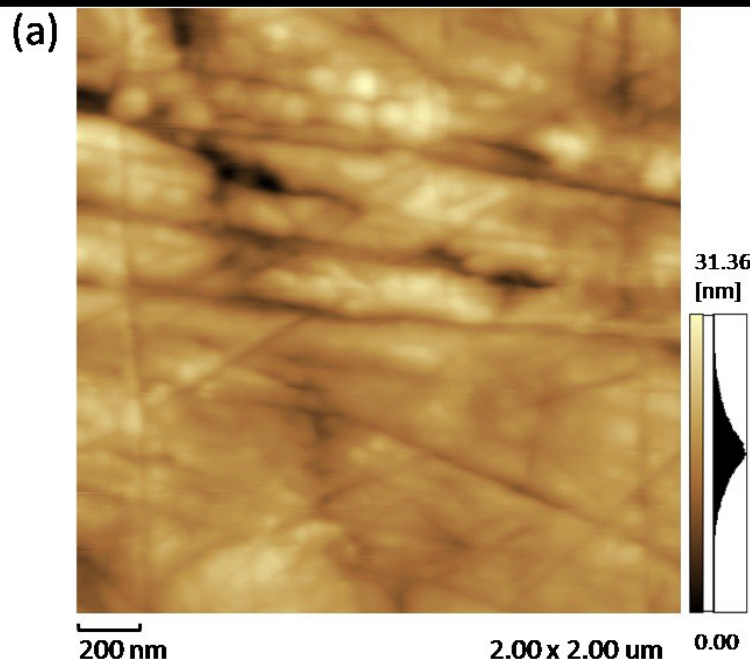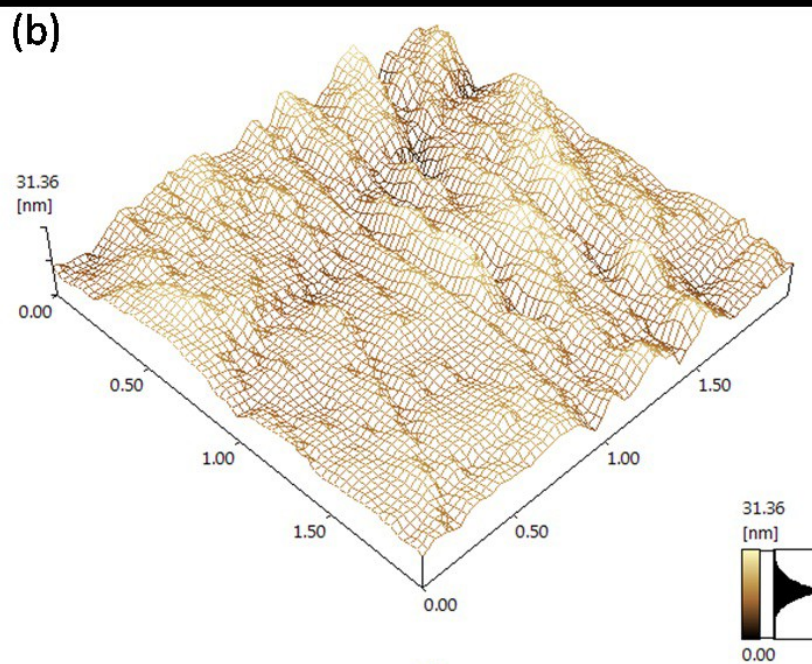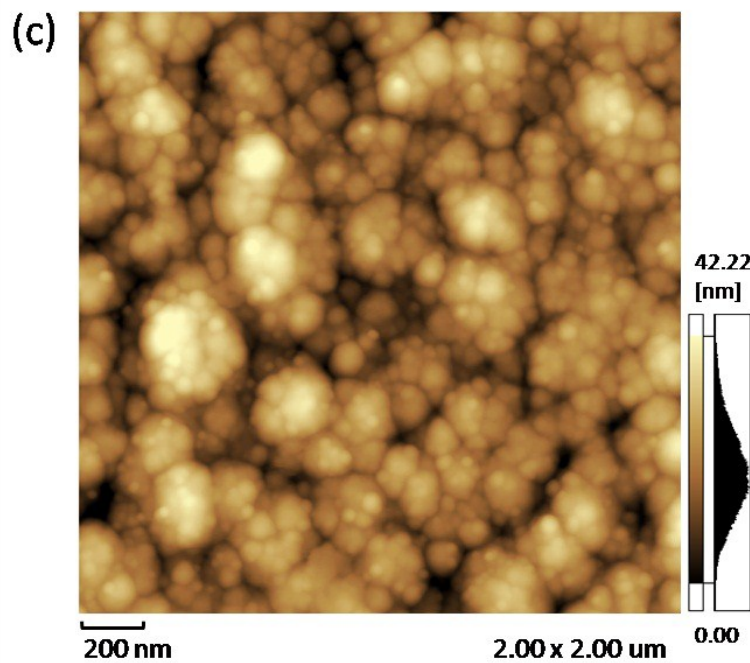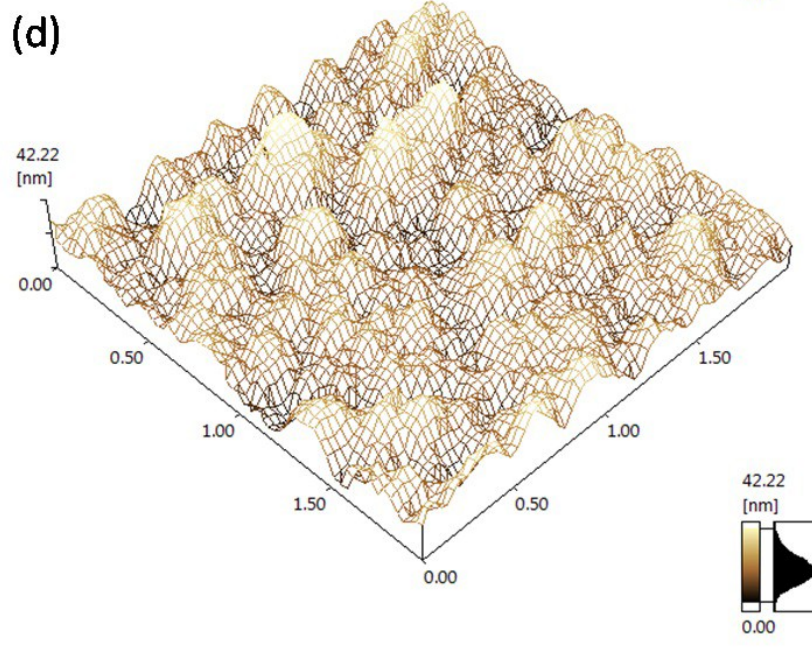

Supplement: c8cp02508h7.pdf [file c8cp02508h7.pdf]

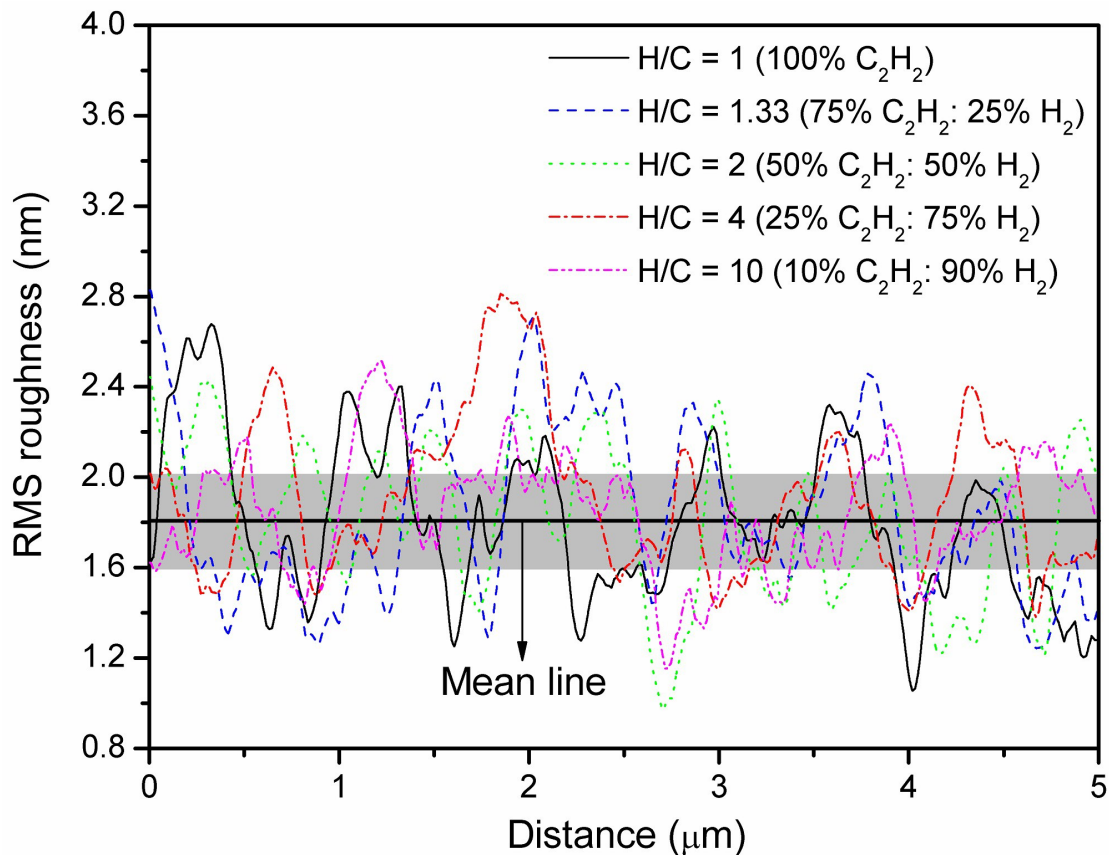

Supplement: c8cp02508h8.pdf [file c8cp02508h8.pdf]
